# Supplementary material
Source: HighWire-hosted journal article supplement (https://cmajopen.ca/highwire/filestream/87527/field_highwire_adjunct_files/1/open-2020-0184-original-submission.pdf)
Supplement: open-2020-0184-original-submission.pdf [file open-2020-0184-original-submission.pdf]

1  
2  
3 TITLE: Paramedic assist-requiring hypoglycemia in adults in south west Ontario, Canada: a  
4 population-based retrospective cohort study.  
5  
6  
7  
8  
9

10 Selina L. Liu MD<sup>1,2</sup>, Melanie P. Columbus PhD<sup>3</sup>, Michael Peddle MD<sup>3</sup>, Jeffrey L. Mahon  
11 MD<sup>1,2</sup>, Tamara Spaic MD<sup>1,2</sup>  
12  
13  
14  
15  
16

17 <sup>1</sup> Division of Endocrinology & Metabolism, Department of Medicine, Schulich School of  
18 Medicine & Dentistry, Western University, London, Ontario, Canada  
19

20 <sup>2</sup> St. Joseph's Health Care London, London, Ontario, Canada  
21

22 <sup>3</sup> Division of Emergency Medicine, Department of Medicine, Schulich School of Medicine &  
23 Dentistry, Western University, London, Ontario, Canada  
24  
25  
26  
27  
28  
29

30 Corresponding Author: Selina L. Liu  
31

32 St. Joseph's Health Care London, 268 Grosvenor St, London ON Canada N6A 4V2  
33

34 Telephone: 519-646-6370 Fax: 619-646-6109  
35

36 Email: [selina.liu@sjhc.london.on.ca](mailto:selina.liu@sjhc.london.on.ca)  
37  
38  
39  
40  
41

42 Word count: 2499  
43

44 Number of tables: 2  
45

46 Number of figures: 1  
47

48 Number of supplementary figures: 1  
49

50 Number of supplementary tables: 1  
51  
52  
53  
54  
55  
56  
57  
58  
59  
60

1  
2  
3 Funding Statement  
4

5 This study was funded by the Divisions of Endocrinology & Metabolism and Emergency  
6  
7 Medicine, Department of Medicine, Schulich School of Medicine & Dentistry, Western  
8  
9 University.  
10  
11  
12  
13

14  
15 Competing Interests  
16

17 S.L.L reports grants and personal fees from NovoNordisk and Sanofi and personal fees from  
18  
19 Merck outside the submitted work. T.S. reports grants from NovoNordisk and personal fees from  
20  
21 Eli Lilly, Insulet Canada and Sanofi Canada outside the submitted work. J.L.M., M.P and M.C.  
22  
23 have no conflicts of interest to disclose.  
24  
25  
26  
27  
28  
29  
30  
31  
32  
33  
34  
35  
36  
37  
38  
39  
40  
41  
42  
43  
44  
45  
46  
47  
48  
49  
50  
51  
52  
53  
54  
55  
56  
57  
58  
59  
60

## ABSTRACT

**Background:** Hypoglycemia is a common treatment consequence in diabetes mellitus. Emergency department visits for hypoglycemia may represent a proportion of severe hypoglycemic events, as many individuals with assist-requiring hypoglycemia do not present to hospital, although in some cases paramedics are called. The study objective was to determine the incidence and characterize paramedic assist-requiring hypoglycemia in adults in south west Ontario, Canada.

**Methods:** This population-based retrospective cohort study used data extracted from ambulance call records of 8 paramedic services of the Southwest Ontario Regional Base Hospital Program from January 2008 to June 2014.

**Results:** There were 9185 paramedic calls for hypoglycemia (mean age 60.2 years, 56.8% male, 81.1% documented diabetes). The mean capillary blood glucose on paramedic arrival was  $2.5 \pm 1.0$  mmol/L. There were 3883 (42.3%) and 1441 (15.7%) calls associated with insulin and oral antihyperglycemic agent use, respectively. Patients refused hospital transport in 24.5% of calls. The estimated annual incidence rate of paramedic assist-requiring hypoglycemia was 108 per 10,000 persons with diabetes per year.

**Interpretation:** Paramedic assist-requiring hypoglycemia in south west Ontario, Canada is common. Up to 25% of paramedic-treated hypoglycemia calls do not result in hospital transport and so physicians managing diabetes care are often unaware of their occurrence. This indicates a significant care gap in follow-up of those with paramedic assist-requiring hypoglycemia.

## INTRODUCTION

Hypoglycemia is a common treatment consequence in diabetes mellitus. It has a negative impact on many health-related outcomes (1-10). Severe hypoglycemia (SHG) i.e. hypoglycemia requiring third-party assistance (11) is common—reported incidence ranges from 0.8 to 3.2 events per person/year (10,12-15) and annual prevalence from 10 to 53% (type 1 diabetes) (12) and 4.4 to 6% (type 2 diabetes) (7,13). Major negative outcomes are associated with SHG, including increased cardiovascular events (1,2), physical injury (3), and mortality (1,2,4,5). SHG impairs quality of life (6,7) and discourages patients from aiming for tighter glyceemic control (8,9). The economic costs of SHG are also significant, accounting for the associated healthcare utilization (16). In Canadians presenting to Emergency Departments (EDs) with SHG between 2008-2010, 82% needed further diagnostic testing and 23% were hospitalized (3). In the United States (US), insulin and oral antihyperglycemic agents (OHA), respectively, were the 2nd and 4th medication classes most frequently associated with emergency hospitalization in adults age  $\geq$  65, with 40.6% and 51.8% of ED visits resulting in hospitalization (17).

However, despite these serious consequences, it is possible that only some patients with SHG present to hospital as many are treated at the scene i.e. by family members. If paramedics are called for a SHG event, patients may subsequently refuse hospital transport. Although reported rates of SHG ED visits are high—a US study estimated > 97,000 ED visits per year for insulin-related hypoglycemia (18)—the true burden of SHG is likely higher when accounting for events not leading to an ED visit. There have been limited studies examining the rate of paramedic assist-requiring hypoglycemia in the pre-hospital setting. This study describes the incidence and

1  
2  
3 characteristics of adult paramedic assist-requiring hypoglycemia calls over 6.5 years in south  
4 west Ontario, Canada.  
5  
6  
7  
8  
9

## 10 METHODS

11  
12  
13

14 We conducted a population-based retrospective cohort study in south west Ontario, Canada.  
15 Ontario is the most populous Canadian province. There are ~1.6 million residents in south west  
16 Ontario (19), ~12% of the provincial population (20). We used data extracted from the electronic  
17 ambulance call records (ACR) of 8 paramedic services (Supplementary Figure 1) under the  
18 direction of the Southwest Ontario Regional Base Hospital Program (SWORBHP). In Ontario,  
19 all paramedics are mandated to complete ACR for all calls attended. In our region, each call is  
20 assigned a unique identifier and data collected are stored in an electronic database housed at the  
21 SWORBHP. Data from all ACRs between January 2008 to June 2014 for adults age  $\geq 18$  in  
22 which paramedics provided treatment for hypoglycemia were included. The following patient  
23 characteristics were extracted from the ACR database: age, sex, diabetes mellitus history, insulin  
24 and OHA use, capillary blood glucose (CBG) (mmol/L) and Glasgow Coma Scale (GCS) score  
25 on paramedic arrival. Call characteristics collected include the time of call, the Canadian Triage  
26 Acuity Scale (CTAS) score, the attending paramedic crew type [Primary Care Paramedic (PCP),  
27 PCP with training to administer intravenous medications (PCP-IV) or Advanced Care Paramedic  
28 (ACP)], the hypoglycemia treatment provided (oral glucose, intravenous (IV) dextrose,  
29 glucagon), final primary problem code (1 of 63 problem codes classified by organ system) and  
30 the return priority code including disposition (transported to hospital or not). In 688 calls, the  
31  
32  
33  
34  
35  
36  
37  
38  
39  
40  
41  
42  
43  
44  
45  
46  
47  
48  
49  
50  
51  
52  
53  
54  
55  
56  
57  
58  
59  
60

1  
2  
3 documented initial CBG value on paramedic arrival was either missing or  $\geq 4$  mmol/L and thus  
4 these ACRs were manually reviewed for CBG value validation.  
5  
6  
7  
8  
9

10 Statistical analysis was performed using SAS for Windows version 9.3 (SAS, Cary, NC, USA).  
11 Patient and call characteristics were summarized using means and standard deviations or  
12 proportions where appropriate. The characteristics of calls with and without transport refusal  
13 were compared using independent t-test (continuous variables) or Chi-square or Fisher's exact  
14 test (categorical variables) as appropriate. Logistic regression was performed to determine  
15 factors associated with hospital transport. An estimate of the annual incidence rate of paramedic  
16 assist-requiring hypoglycemia calls was determined for 2009-2013 (partial years 2008 and 2014  
17 not included), using diabetes prevalence data from provincial administrative databases (21). The  
18 study was approved by the Western University Health Sciences Research Ethics Board. We used  
19 the STROBE cohort checklist when writing our report (22).  
20  
21  
22  
23  
24  
25  
26  
27  
28  
29  
30  
31  
32  
33  
34

## 35 RESULTS

36  
37  
38  
39  
40 There were 9185 paramedic calls in which treatment for hypoglycemia to adult patient was  
41 provided during the study period. The number of calls per complete year by paramedic service is  
42 shown in Figure 1. The estimated incidence rate of paramedic assist-requiring hypoglycemia  
43 calls from 2009-2013 was  $\sim 108$  per 10,000 persons with diabetes per year, based on the  
44 estimated number of adults with diabetes (134,449) in the geographic area covered by the  
45 SWORBHP in 2011 (21).  
46  
47  
48  
49  
50  
51  
52  
53  
54  
55  
56  
57  
58  
59  
60

1  
2  
3 The patient and call characteristics are summarized in Table 1. The final primary problem code  
4 was “diabetic emergency” in 67.5% of calls, with 1 of 40 other primary problem codes noted for  
5 the remaining calls (Supplementary Table 1). Disposition data were available for 9173 calls,  
6 summarized in Table 2. Of the 2428 (26.5%) calls with no transport, 92.4% were due to patient  
7 refusal and thus transport refusal occurred in 24.5% of the total calls during the study period.  
8  
9 Patient death occurred in 27 (0.3%) calls.  
10  
11  
12  
13  
14  
15  
16  
17  
18

19 The characteristics of the calls with and without transport refusal were compared, summarized in  
20 Table 1. Patients who refused transport were younger (58.6 years vs. 60.8 years,  $p<0.0001$ ), a  
21 higher proportion were male (59.6% vs. 55.9%,  $p=0.002$ ), and had a higher mean CBG on  
22 paramedic arrival (3.2 vs. 2.3 mmol/L,  $p<0.0001$ ). However, a smaller proportion had  
23 documented diabetes (77.8% vs. 82.2%,  $p<0.0001$ ), used OHA (14.1% vs. 16.2%,  $p=0.018$ ), had  
24 GCS  $< 9$  (17.6% vs. 26.3%,  $p<0.0001$ ) and CTAS  $\leq 3$  (91.7% vs. 96.6%,  $p<0.0001$ ) compared to  
25 calls when transport to hospital was not refused. . A higher proportion of overnight (18:00 to  
26 06:00) calls were in those with transport refusal (50.1% vs. 46.4%,  $p=0.002$ ). There was a  
27 significant difference in hypoglycemia treatment ( $p<0.0001$ ), with higher oral glucose and lower  
28 IV dextrose and glucagon in those who refused transport.  
29  
30  
31  
32  
33  
34  
35  
36  
37  
38  
39  
40  
41  
42  
43

44 Univariate analyses showed that older age, female sex, documented diabetes, OHA use, lower  
45 CBG, lower GCS, lower acuity CTAS, daytime (06:00 to 18:00) call, hypoglycemia treatment,  
46 and final primary problem code of “diabetic emergency” were each significantly associated with  
47 transport to hospital (each  $p<0.05$ ) but insulin use ( $p=0.80$ ) and crew type ( $p=0.37$ ) were not. On  
48 multivariate analyses, older age, female sex, no documented diabetes, lower CBG, lower GCS,  
49  
50  
51  
52  
53  
54  
55  
56  
57  
58  
59  
60

1  
2  
3 lower acuity CTAS, daytime call, hypoglycemia treatment and final primary problem code as a  
4  
5 “diabetic emergency” were independently associated with increased odds of transport to hospital.  
6  
7

## 8 9 10 INTERPRETATION

11  
12  
13  
14 There are limited population-based data on SHG in the pre-hospital setting. In this study, we  
15 described > 9000 calls for paramedic assist-requiring hypoglycemia in adults in south west  
16 Ontario, Canada over 6.5 years. The estimated annual incidence rate of calls was high: 108 per  
17 10,000 persons with diabetes per year. We found that more calls occurred in older men with  
18 known diabetes, of whom only half used insulin. Patients who refused hospital transport  
19 following paramedic intervention differed significantly from those who did not with respect to  
20 age, sex, diabetes, mean CBG on paramedic arrival, GCS, CTAS, time of calls and treatment.  
21  
22  
23  
24  
25  
26  
27  
28  
29  
30

31  
32  
33 To our knowledge, this study is the largest population-based study of paramedic assist-requiring  
34 hypoglycemia in Canada, and is 1 of few studies (23-25) of longer duration i.e. > 5 years  
35 worldwide. Our inclusion criteria were predetermined and data were obtained from a  
36 comprehensive database of all calls in a geographically defined region. To ensure data validity,  
37 we manually reviewed the CBG value on paramedic arrival in 7.5% of calls. Our results confirm  
38 that, in our region, paramedic assist-requiring SHG is common and that a significant proportion  
39 (25%) of cases are not transported to hospital. Data from these patients would not be captured in  
40 administrative databases that collect information from ED visits so our results more accurately  
41 characterize paramedic assist-requiring SHG.  
42  
43  
44  
45  
46  
47  
48  
49  
50  
51  
52  
53  
54  
55  
56  
57  
58  
59  
60



1  
2  
3 There are challenges comparing the frequency of paramedic assist-requiring calls between  
4  
5 studies. Prior studies are mostly of shorter duration in varied populations (16,23-31) with  
6  
7 reported incidence ranging from 4.8 to 103 per 10,000 person-years (PY) in Victoria, Australia  
8  
9 (25) to 1150 per 10,000 PY (type 1 diabetes) and 1180 per 10,000 PY (type 2 diabetes) in  
10  
11 Tayside, Scotland (16) (though the Tayside study was > 20 years ago, prior to the advent of  
12  
13 newer analog insulins with lower hypoglycemia risk and more advanced glucose monitoring  
14  
15 technology). There have been 2 prior Canadian studies (32,33) but both were  $\leq$  1-year duration  
16  
17 and did not estimate annual incidence. The age and sex of patients in our study were similar to  
18  
19 prior reports (23-28,30,31,33-36). A high proportion (81.1%) had documented diabetes, though  
20  
21 only 42.3% used insulin, lower than prior studies (23,24,27,30) in which insulin use ranged from  
22  
23 74.0% (30) to 75.9% (type 2 diabetes) and 99.5% (type 1 diabetes) (23). Also notable, we report  
24  
25 higher glucagon use (either alone or in combination) (36.9%) than other studies where it ranged  
26  
27 from 0.01% (35) to 17.8% (33). A US emergency medical services (EMS) registry study also  
28  
29 showed glucagon underutilization and postulated that crew type may be contributory, as ~75% of  
30  
31 US EMS providers are not paramedics and thus unable to administer glucagon (37). In Ontario,  
32  
33 Canada, both ACP and PCP may administer glucagon, but only ACP and PCP with specialized  
34  
35 training (PCP-IV) can administer IV dextrose. In our study, PCP (73.3% PCP, 1.7% PCP-IV)  
36  
37 attended 75% of calls, in contrast to a study in Ottawa, Ontario by Sinclair et al. in which ACP  
38  
39 attended 80.1% of calls (33). Despite this crew type difference, the proportion of patients in our  
40  
41 study treated with IV dextrose was similar to Sinclair et al. (42.8% vs. 37.8%), but in our study a  
42  
43 much higher proportion received glucagon (36.9% vs. 17.8%) (33). Thus, differences in  
44  
45 paramedic scope of practice by jurisdiction may explain some, but not all, differences between  
46  
47  
48  
49  
50  
51  
52  
53  
54  
55  
56  
57  
58  
59  
60

1  
2  
3 hypoglycemia treatment in our study and other reports. We did not have information on whether  
4 patients self-treated prior to paramedic arrival.  
5  
6  
7  
8  
9

10 In our study, patients refused transport to hospital in ~one-quarter of the total calls. Patient  
11 refusal of transport has been commonly reported elsewhere (26,28,33,35,37) with similar  
12 transport refusal rates (17.7% to 29.7%). We showed that in calls with transport refusal, patients  
13 were younger, more often men, had a higher mean CBG on paramedic arrival, and a higher  
14 proportion were overnight. A lower proportion had diabetes,  $GCS < 9$ ,  $CTAS \leq 3$ , and used  
15 OHA, similar to other studies reporting transport refusal by younger men and those less likely to  
16 be on OHA (33,38). We speculate that in our study, those who refused transport may represent  
17 younger patients with less severe hypoglycemia potentially related to more remediable causes  
18 (i.e. missed meal, miscalculation of insulin dose) rather than more serious underlying illness.  
19 Thus, although they did require a paramedic call and subsequent SHG treatment, after recovery  
20 they were less willing to seek further care in the ED. Contrary to our results, other studies have  
21 shown higher prevalence of insulin use in patients who refused transport (33,38).  
22  
23  
24  
25  
26  
27  
28  
29  
30  
31  
32  
33  
34  
35  
36  
37  
38  
39

40 Given the significant proportion of SHG paramedic calls with transport refusal, many patients  
41 may not receive appropriate follow-up care. In the United Kingdom, strategies to facilitate timely  
42 access to care post-paramedic assist-requiring SHG have been assessed, including early referral  
43 for education (39) and phone calls/reminder cards to contact their diabetes care providers (40).  
44 Although patients perceived these programs positively (39,40), the interventions did not increase  
45 follow-up diabetes care attendance (40). Another study evaluated an “opt-out” referral pathway  
46 where patients declining participation had to telephone within 3 days, which led to follow-up  
47  
48  
49  
50  
51  
52  
53  
54  
55  
56  
57  
58  
59  
60

1  
2  
3 hypoglycemia education delivery in 72.1% of the first 2000 referrals (41). To our knowledge, no  
4 such programs exist in North America. In our region, follow-up for patients with diabetes  
5 presenting to the ED with SHG is individualized depending on the context (i.e. with family  
6 physician/endocrinologist or diabetes educator, with referrals made as necessary), but these  
7 arrangements are not possible if patients are not seen in the ED. Since our study showed that this  
8 represents a sizable proportion of paramedic-assisted SHG cases, we are completing a project  
9 assessing the impact of a direct paramedic referral pathway in which electronic referrals were  
10 sent at the time of paramedic assessment for patients with SHG to receive follow-up focused  
11 hypoglycemia education.  
12  
13  
14  
15  
16  
17  
18  
19  
20  
21  
22  
23  
24  
25

26 A study limitation is that we were not able to identify unique individuals, only unique calls; thus  
27 we did not have data on repeated calls by individuals. The repeat SHG call rate in the Middlesex-  
28 London Paramedic Service (the largest paramedic service in the SWORBHP) over 6 months in  
29 2014 was 26% (personal communication), similar to other studies (32-34) with repeat call rates  
30 ranging from 13.5% to 25.9%. We were also not able to distinguish diabetes type, i.e. type 1 or  
31 2, though variation in the incidence of paramedic assist-requiring hypoglycemia by diabetes type  
32 has been reported (16,26-29). However, since insulin use was reported in only 42.3% of calls, it  
33 may be inferred that a high proportion of our study patients had type 2 diabetes. Finally, although  
34 our study encompassed a large geographic area served by the SWORBHP, the results may not be  
35 generalizable to other populations.  
36  
37  
38  
39  
40  
41  
42  
43  
44  
45  
46  
47  
48  
49  
50

51 This large population-based study demonstrates the high incidence of paramedic assist-requiring  
52 hypoglycemia in south west Ontario, Canada. It also highlights the high transport refusal rate in  
53  
54  
55  
56  
57  
58  
59  
60

1  
2  
3 paramedic-treated SHG, and thus diabetes care providers are often unaware and unable to  
4  
5 provide recommendations to help decrease SHG frequency. This is an important care gap as it  
6  
7 represents missed opportunities to intervene with strategies to prevent recurrent SHG events,  
8  
9 which could ultimately decrease morbidity and mortality and improve quality of life. Future  
10  
11 studies are required to identify approaches to facilitate more direct communication of SHG  
12  
13 occurrence between patients, emergency medical services, and physicians involved in their  
14  
15 diabetes care, and to elucidate patient-important barriers to presenting to the ED for SHG.  
16  
17  
18  
19  
20  
21  
22  
23  
24  
25  
26  
27  
28  
29  
30  
31  
32  
33  
34  
35  
36  
37  
38  
39  
40  
41  
42  
43  
44  
45  
46  
47  
48  
49  
50  
51  
52  
53  
54  
55  
56  
57  
58  
59  
60

Confidential

## AUTHOR CONTRIBUTIONS

S.L.L. contributed to the design and conduct of the study and analysis plan, and interpretation of the data, wrote the first draft of the manuscript, reviewed and approved the manuscript, and is the guarantor of the work. J.L.M. conceived the study idea, contributed to the design and conduct of the study and interpretation of the data, and reviewed and approved the manuscript. M.P. and M.C. contributed to the design and conduct of the study and interpretation of the data, and reviewed and approved the manuscript. T.S. contributed to the design and conduct of the study and analysis plan and interpretation of the data, and reviewed and approved the manuscript.

## Acknowledgements

The authors thank Mr. Alan Rice of the Southwest Ontario Regional Base Hospital Program and Ms. Heather Reid and Ms. Sydney Driscoll of the Division of Endocrinology & Metabolism for their assistance with data extraction, cleaning and analysis. This study was funded by the Division of Endocrinology & Metabolism and the Southwest Ontario Regional Base Hospital Program.

This study was presented in abstract form at the at the 18th Annual Diabetes Canada/Canadian Society of Endocrinology & Metabolism Professional Conference and Annual Meeting, Ottawa, Ontario, Canada October 26-29, 2016.

## REFERENCES

1. Davis SN, Duckworth W, Emanuele N, Hayward RA, Wiitala WL, Thottapurathu L, et al. Effects of severe hypoglycemia on cardiovascular outcomes and death in the Veterans Affairs Diabetes Trial. *Diabetes Care*. 2019;42(10):157-63.
2. Zoungas S, Patel A, Chalmers J, de Galan BE, Li Q, Billot L, et al. Severe hypoglycemia and risks of vascular events and death. *N Engl J Med*. 2010;363(15):1410-8.
3. Rowe BH, Singh M, Villa-Roel C, Leiter LA, Hramiak I, Edmonds ML, et al. Acute management and outcomes of patients with diabetes mellitus presenting to Canadian emergency departments with hypoglycemia. *Can J Diabetes*. 2015;39(1):55-64.
4. Bonds DE, Miller ME, Bergenstal RM, Buse JB, Byington RP, Cutler JA, et al. The association between symptomatic, severe hypoglycemia and mortality in type 2 diabetes: retrospective epidemiologic analysis of the ACCORD study. *BMJ*. 2010;340:b4909.
5. McCoy RG, Van Houten HK, Ziegenfuss JY, Shah ND, Wermers RA, Smith SA. Increased mortality of patients with diabetes reporting severe hypoglycemia. *Diabetes Care*. 2012;35(9):1897-901.
6. Jacobson AM, Braffett BH, Cleary PA, Gubitosi-Klug RA, Larkin ME, the DCCT/EDIC Research Group. The long-term effects of type 1 diabetes treatment and complications on health-related quality of life: a 23-year follow-up of the Diabetes Control and Complications/Epidemiology of Diabetes Interventions and Complications cohort. *Diabetes Care*. 2013;36(10):3131-8.
7. Simon D, de Pablos-Velasco P, Parhofer KG, Gönder-Frederick L, Duprat Lomon I, Vandenberghe H, et al. Hypoglycaemic episodes in patients with type 2 diabetes--risk factors and associations with patient-reported outcomes: The PANORAMA Study. *Diabetes Metab*. 2015;41(6):470-9.
8. Hendrieckx C, Ivory N, Singh H, Frier BM, Speight S. Impact of severe hypoglycaemia on psychological outcomes in adults with Type 2 diabetes: a systematic review. *Diabet Med*. 2019;36(9):1082-91.
9. Wild D, von Maltzahn R, Brohan E, Christensen T, Clauson P, Gonder-Frederick L. A critical review of the literature on fear of hypoglycemia in diabetes: implications for diabetes management and patient education. *Patient Educ Couns*. 2007;68(1):10-15
10. Aronson R, Goldenberg R, Boras D, Skovgaard R, Bajaj H. The Canadian Hypoglycemia Assessment Tool Program: insights into rates and implications of hypoglycemia from an observational study. *Can J Diab*. 2017 May 17. pii: S1499-2671(16)30781-X.

- 1  
2  
3 11. Workgroup on Hypoglycemia, American Diabetes Association. Defining and reporting  
4 hypoglycemia in diabetes: a report from the American Diabetes Association Workgroup on  
5 Hypoglycemia. *Diabetes Care*. 2005;28(5):1245-9.  
6
- 7  
8 12. Pedersen-Bjergaard U & Thorsteinsson B. Reporting severe hypoglycemia in type 1 diabetes:  
9 facts and pitfalls. *Curr Diab Rep*. 2017;17(12):131.  
10
- 11 13. Edridge CL, Dunkley AJ, Bodicoat DH, Rose TC, Gray LJ Davies MJ, et al. Prevalence and  
12 incidence of hypoglycaemia in 532,542 people with type 2 diabetes on oral therapies and insulin:  
13 a systematic review and meta-analysis of population based studies. *PloS One*. 2015;10(6):  
14 e0126427.  
15
- 16 14. Donnelly LA, Morris AD, Frier BM, Ellis JD, Donnan PT, Durrant R, et al. Frequency and  
17 predictors of hypoglycaemia in type 1 and insulin-treated type 2 diabetes: a population-based  
18 study. *Diabet Med*. 2005;22(6):749-55.  
19
- 20 15. UK Hypoglycaemia Study Group. Risk of hypoglycaemia in types 1 and 2 diabetes: effects  
21 of treatment modalities and their duration. *Diabetologia* 2007;50(6):1140-7.  
22
- 23 16. Leese GP, Wang J, Broomhall J, Kelly P, Marsden A, Morrison W, et al. Frequency of  
24 severe hypoglycemia requiring emergency treatment in type 1 and type 2 diabetes: a population-  
25 based study of health service resource use. *Diabetes Care*. 2003;26(4):1176-80.  
26
- 27 17. Budnitz DS, Lovegrove MC, Shehab N, Richards CL. Emergency hospitalizations for  
28 adverse drug events in older Americans. *N Engl J Med*. 2011;365(21):2002-12.  
29
- 30 18. Geller AI, Shehab N, Lovegrove MC, Kegler SR, Weidenbach KN, Ryan GJ, et al. National  
31 estimates of insulin-related hypoglycemia and errors leading to emergency department visits and  
32 hospitalizations. *JAMA Intern Med*. 2014;174(5):678-86.  
33
- 34 19. Ontario Ministry of Finance. *Ontario Population Projections, 2018-2046*. “Table 4:  
35 *Historical and projected population by census division, selected years – reference scenario*”  
36 (table). <https://www.fin.gov.on.ca/en/economy/demographics/projections/table4.html> (accessed  
37 July 9, 2020).  
38
- 39 20. Statistics Canada. 2011. *2011 Census Profile* (table). “Canada, provinces and territories,  
40 2011 Census Profile”. Statistics Canada Catalogue no 98-316-XWE2011001-101. Ottawa,  
41 Ontario. [https://www12.statcan.gc.ca/census-recensement/2011/dp-pd/prof/details/download-  
42 telecharger/comprehensive/comp-csv-tab-dwnld-tlchrgr.cfm?Lang=E#tabs2011](https://www12.statcan.gc.ca/census-recensement/2011/dp-pd/prof/details/download-telecharger/comprehensive/comp-csv-tab-dwnld-tlchrgr.cfm?Lang=E#tabs2011) (accessed July 9,  
43 2020.)  
44
- 45 21. Booth GL, Polsky JY, Gozdyra P, Cauch-Dudek K, Kiran T, Shah BR, et al. Regional  
46 Measures of Diabetes Burden in Ontario. Toronto: Institute for Clinical Evaluative Sciences;  
47 2012.  
48  
49  
50  
51  
52  
53  
54  
55  
56  
57  
58  
59  
60

22. von Elm E, Altman DG, Egger M, Pocock SJ, Gøtzsche PC, Vandenbroucke JP. The Strengthening the Reporting of Observational Studies in Epidemiology (STROBE) Statement: guidelines for reporting observational studies. *Lancet* 2007. 370;9596:1453-7.
23. Parsaik AK, Carter RE, Pattan V, Myers LA, Kumar H, Smith SA, et al. Population-based study of severe hypoglycemia requiring emergency medical service assistance reveals unique findings. *J Diabetes Sci Technol*. 2012 Jan 1;6(1):65-73.
24. Elwen FR, Huskinson A, Clapham L, Bottomley MJ, Heller SR, James C, et al. An observational study of patient characteristics and mortality following hypoglycemia in the community. *BMJ Open Diabetes Res Care*. 2015 Jun 30;3(1):e000094.
25. Villani M, Earnest A, Smith K, de Courten B, Zoungas S. Geographical variation of diabetic emergencies attended by prehospital emergency medical services is associated with measures of ethnicity and socioeconomic status. *Sci Rep*. 2018 Mar 23;8(1):5122. doi: 10.1038/s41598-018-23457-5.
26. Farmer AJ, Brockbank KJ, Keech ML, England EJ, Deakin CD. Incidence and costs of severe hypoglycaemia requiring attendance by the emergency medical services in South Central England. *Diabet Med*. 2012;29(11):1447-50.
27. Krnacova V, Kubena A, Macek K, Bezdek M, Smahelova A, Vlcek J. Severe hypoglycaemia requiring the assistance of emergency medical services--frequency, causes and symptoms. *Biomed Pap Med Fac Univ Palacky Olomouc Czech Repub*. 2012;156(3):271-7.
28. Villani M, Nanayakkara N, Ranasinha S, Earnest A, Smith K, Soldatos G, et al. Utilisation of emergency medical services for severe hypoglycaemia: An unrecognised health care burden. *J Diabetes Complications*. 2016;30(6):1081-6.
29. Wang H, Donnan PT, Leese CJ, Duncan E, Fitzpatrick D, Frier BM, et al. Temporal changes in frequency of severe hypoglycemia treated by emergency medical services in types 1 and 2 diabetes: a population-based data-linkage cohort study. *Clin Diabetes Endocrinol*. 2017 Aug 15;3:7.
30. Khunti K, Fisher H, Paul S, Iqbal M, Davies MJ, Siriwardena AN. Severe hypoglycaemia requiring emergency medical assistance by ambulance services in the East Midlands: a retrospective study. *Prim Care Diabetes*. 2013;7(2):159-65.
31. Barranco RJ, Gomez-Peralta F, Abreu C, Delgado M, Palomares R, Romero F, et al. Incidence and care-related costs of severe hypoglycaemia requiring emergency treatment in Andalusia (Spain): the PAUEPAD project. *Diabet Med*. 2015;32(11):1520-6.
32. Cain E, Ackroyd-Stolarz S, Alexiadis P, Murray D. Prehospital hypoglycemia: the safety of not transporting treated patients. *Prehosp Emerg Care*. 2003;7(4):458-65.
33. Sinclair JE, Austin M, Froats M, Leduc S, Maloney J, Dionne R, et al. Characteristics, prehospital management, and outcomes in patients assessed for hypoglycemia: repeat access to prehospital or emergency care. *Prehosp Emerg Care*. 2019;23(4):453-64.



- 1  
2  
3 34. O'Connor L, Kue RC, O'Connor MJ. Characteristics of patients with recurrent Emergency  
4 Medical Services utilization for symptomatic hypoglycemia in an urban setting. *Prehosp Emerg*  
5 *Care*. 2019;20:1-8.  
6  
7 35. Moffet HH, Warton EM, Siegel L, Sporer K, Lipska KJ, Karter AJ. Hypoglycemia patients  
8 and transport by EMS in Alameda County, 2013-15. *Prehosp Emerg Care*. 2017;21(6):767-772.  
9  
10 36. Kaufmann MA, Nelson DR, Kaushik P, Mann NC, Mitchell B. Hypoglycemia emergencies:  
11 factors associated with prehospital care, transportation status, emergency department disposition,  
12 and cost. *Prehosp Emerg Care*. 2018;2:1-12.  
13  
14 37. Kahn PA, Wagner, NE, Gabbay RA. Underutilization of glucagon in the prehospital setting.  
15 *Ann Intern Med*. 2018;168(8):603-4.  
16  
17 38. Socransky SJ, Pirralo RG, Rubin JM. Out-of-hospital treatment of hypoglycemia: refusal of  
18 transport and patient outcome. *Acad Emerg Med*. 1998;5(11):1080-5.  
19  
20 39. Walker A, James C, Bannister M, Jobes E. Evaluation of a diabetes referral pathway for the  
21 management of hypoglycaemia following emergency contact with the ambulance service to a  
22 diabetes specialist nurse team. *Emerg Med J*. 2006;23(6):449-51.  
23  
24 40. Duncan EA & Fitzpatrick D. Improving self-referral for diabetes care following  
25 hypoglycaemic emergencies: a feasibility study with linked patient data analysis. *BMC Emerg*  
26 *Med*. 2016 Feb 18;16:13.  
27  
28 41. Sampson M, Bailey M, Clark J, Evans ML, Fong R, Hall H, et al. A new integrated care  
29 pathway for ambulance attended severe hypoglycaemia in the East of England: The Eastern  
30 Academic Health Science Network (EAHSN) model. *Diabetes Res Clin Pract*. 2017; 133:50-9.  
31  
32  
33  
34  
35  
36  
37  
38  
39  
40  
41  
42  
43  
44  
45  
46  
47  
48  
49  
50  
51  
52  
53  
54  
55  
56  
57  
58  
59  
60

Table 1 – Patient and paramedic call characteristics (January 2008- June 2014) (N=9185 calls), stratified by refusal of transport.

|                                                                                | Total        | Transport Refusal | No Refusal of Transport | p-value* |
|--------------------------------------------------------------------------------|--------------|-------------------|-------------------------|----------|
| Calls                                                                          | 9185         | 24.4% (2243)      | 75.6% (6942)            |          |
| <b>Patient Characteristics</b>                                                 |              |                   |                         |          |
| Age (years), mean ± SD (N=9162)                                                | 60.2 ± 19.0  | 58.6 ± 19.7       | 60.8 ± 18.7             | <0.0001  |
| Male (N=9146)                                                                  | 56.8% (5197) | 59.6% (1333)      | 55.9% (3864)            | 0.002    |
| Documented diabetes diagnosis                                                  | 81.1% (7450) | 77.8% (1746)      | 82.2% (5704)            | <0.0001  |
| Insulin use                                                                    | 42.3% (3883) | 42.9% (963)       | 42.1% (2920)            | 0.483    |
| Oral antihyperglycemic agent use                                               | 15.7% (1441) | 14.1% (316)       | 16.2% (1125)            | 0.018    |
| Mean capillary blood glucose on paramedic arrival (mmol/L), mean ± SD (N=9026) | 2.5 ± 1.0    | 3.2 ± 1.1         | 2.3 ± 0.9               | <0.0001  |
| Capillary blood glucose on paramedic arrival <2.5 mmol/L (N=9026)              | 54.6% (4931) | 23.5% (504)       | 64.4% (4427)            | <0.0001  |
| Initial Glasgow Coma Score <9 (N=9019)                                         | 24.2% (2181) | 17.6% (385)       | 26.3% (1796)            | <0.0001  |
| <b>Call Characteristics</b>                                                    |              |                   |                         |          |
| Canadian Triage Acuity Score ≤ 3 (N=7731)                                      | 95.5% (7383) | 91.7% (1561)      | 96.6% (5822)            | <0.0001  |
| Time of Calls (N=9092)                                                         |              |                   |                         |          |
| 00:00 to 05:59                                                                 | 20.5% (1860) | 22.6% (502)       | 19.8% (1358)            | 0.0074   |
| 06:00 to 11:59                                                                 | 22.9% (2084) | 22.2% (493)       | 23.2% (1591)            |          |
| 12:00 to 17:59                                                                 | 29.8% (2706) | 27.7% (615)       | 30.4% (2091)            |          |
| 18:00 to 23:59                                                                 | 26.9% (2442) | 27.5% (612)       | 26.6% (1830)            |          |
| Type of crew (N=9168)                                                          |              |                   |                         |          |
| Emergency Medical Assistant                                                    | 0.02% (2)    | 0.04% (1)         | 0.01% (1)               | 0.1711   |
| Primary Care Paramedic                                                         | 73.3% (6717) | 74.1% (1657)      | 73.0% (5060)            |          |
| Primary Care Paramedic-IV                                                      | 1.7% (159)   | 1.3% (29)         | 1.9% (130)              |          |
| Advanced Care Paramedic                                                        | 25.0% (2290) | 24.6% (550)       | 25.1% (1740)            |          |
| Treatment                                                                      |              |                   |                         |          |
| Oral glucose alone                                                             | 22.6% (2072) | 38.8% (871)       | 17.3% (1201)            | <0.0001  |
| IV dextrose alone                                                              | 34.7% (3189) | 29.3% (656)       | 36.5% (2533)            |          |
| Glucagon alone                                                                 | 18.3% (1679) | 15.1% (339)       | 19.3% (1340)            |          |
| Oral glucose and IV dextrose                                                   | 5.8% (534)   | 3.7% (84)         | 6.5% (450)              |          |
| Oral glucose and glucagon                                                      | 16.3% (1501) | 11.8% (264)       | 17.8% (1237)            |          |
| IV dextrose and glucagon                                                       | 2.0% (186)   | 1.1% (24)         | 2.3% (162)              |          |

|                                                  | Oral glucose, IV dextrose and glucagon | 0.3% (24)    | 0.2% (5)     | 0.3% (19)    |         |
|--------------------------------------------------|----------------------------------------|--------------|--------------|--------------|---------|
| Treatment (Not mutually exclusive <sup>†</sup> ) |                                        |              |              |              |         |
|                                                  | Oral glucose                           | 45.0% (4131) | 1224 (54.6%) | 2907 (41.9%) | <0.0001 |
|                                                  | IV dextrose                            | 42.8% (3933) | 769 (34.3%)  | 3164 (45.6%) | <0.0001 |
|                                                  | Glucagon                               | 36.9% (3390) | 632 (28.2%)  | 2758 (39.7%) | <0.0001 |

Data are presented as % (N) unless otherwise indicated. SD, standard deviation; IV, intravenous.

\*Comparison of those who refused transport vs. those who did not refuse transport using independent t-test (continuous variables) or Chi-square or Fisher's exact test as appropriate (categorical variables).

<sup>†</sup>More than one type of treatment may have been administered (so sum is greater than total number of calls).

Confidential

Table 2 – Patient disposition as per return priority code (N=9173)

| Patient Transported by Paramedics     |      |                            |                   |
|---------------------------------------|------|----------------------------|-------------------|
|                                       | N    | % of those transported     | % of total calls* |
| Transport of Deceased Patient         | 1    | 0.01%                      | 0.01%             |
| Scheduled                             | 8    | 0.1%                       | 0.09%             |
| Deferable                             | 66   | 1.0%                       | 0.7%              |
| Prompt                                | 4462 | 66.2%                      | 48.6%             |
| Urgent                                | 2208 | 32.7%                      | 24.1%             |
| Subtotal                              | 6745 |                            | 73.5%             |
| Patient Not Transported by Paramedics |      |                            |                   |
|                                       | N    | % of those not transported | % of total calls* |
| Patient in Police Custody             | 3    | 0.1%                       | 0.03%             |
| No Patient Found                      | 9    | 0.4%                       | 0.1%              |
| Patient Deceased                      | 26   | 1.1%                       | 0.3%              |
| Transported by Other Ambulance        | 147  | 6.1%                       | 1.6%              |
| Patient Refused                       | 2243 | 92.4%                      | 24.5%             |
| Subtotal                              | 2428 |                            | 26.5%             |

\*total calls with disposition data available (N=9173).

Note: percentages may not add up to 100% due to rounding.

Figure 1 – Paramedic assist-requiring calls for hypoglycemia per year 2009-2013, by paramedic service

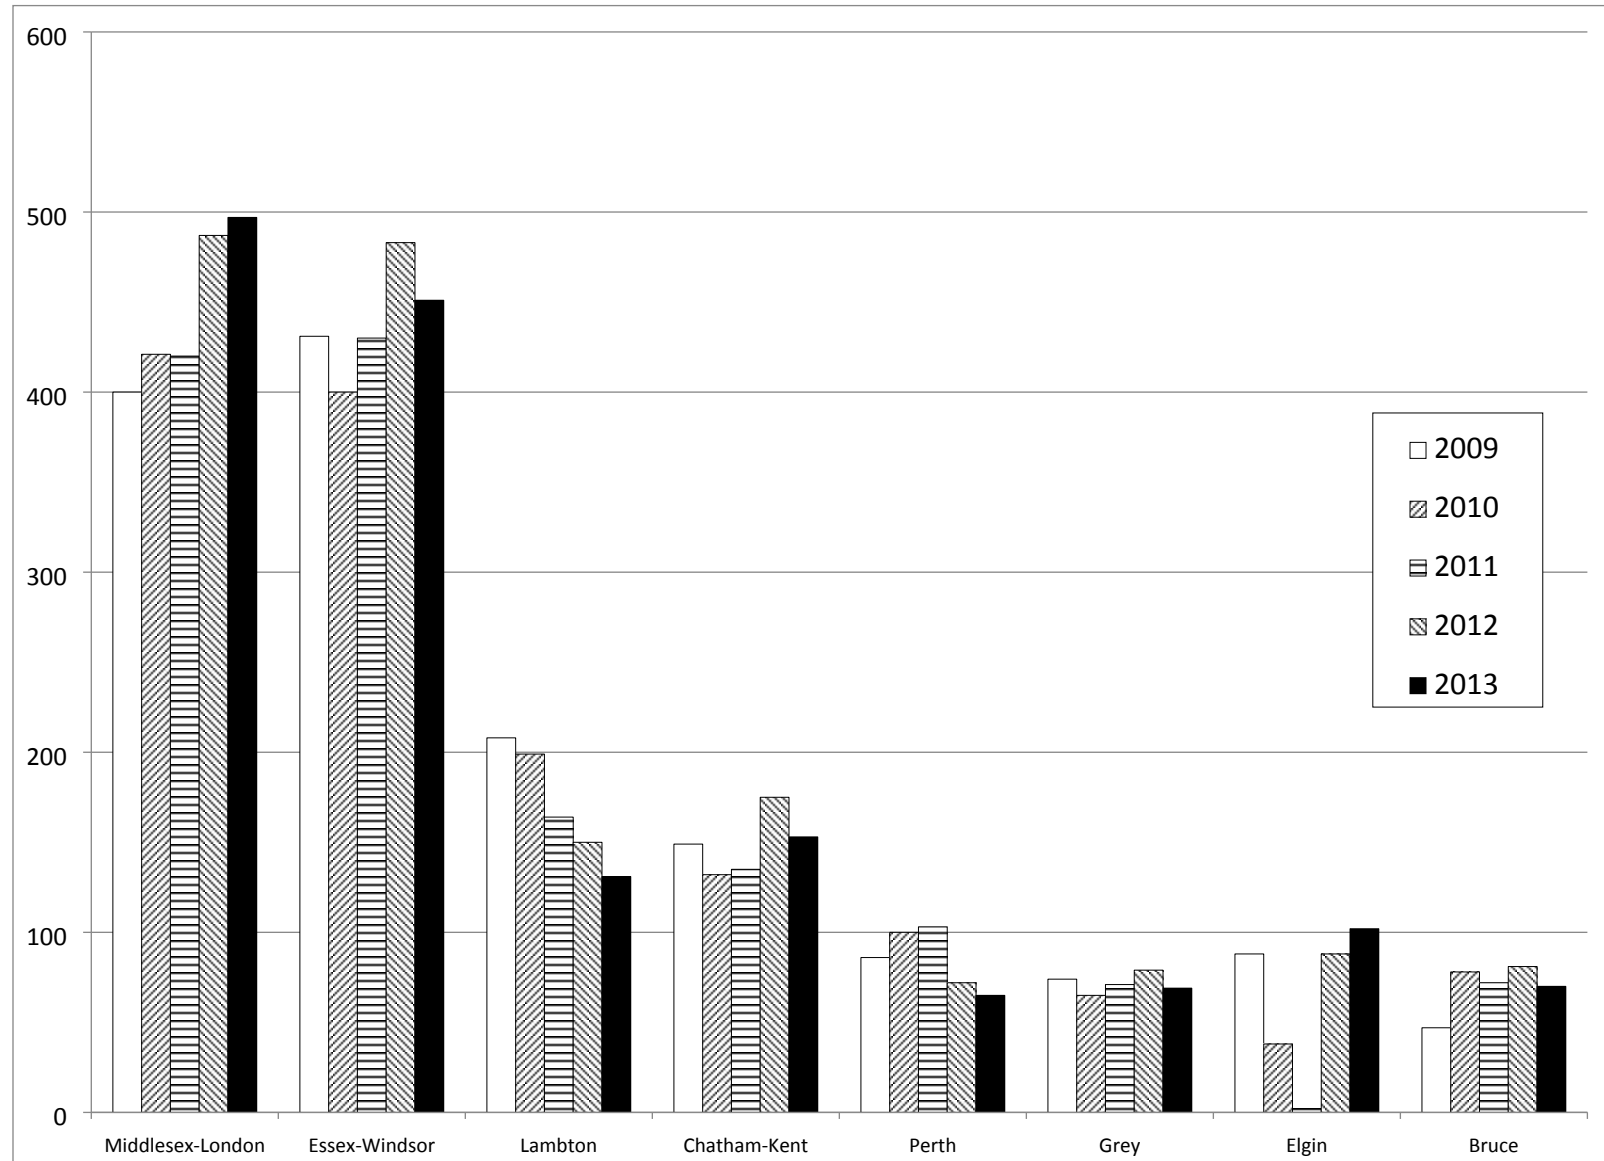

Supplementary Figure 1 – Paramedic Services of the Southwest Region Base Hospital Program

Paramedic Services included in the study:

Middlesex-London Paramedic Service

Essex-Windsor EMS

The County of Lambton EMS

Medavie EMS Chatham-Kent

Perth County Paramedic Services

Grey County Paramedic Services

Medavie EMS Elgin Ontario

Bruce County Paramedic Services

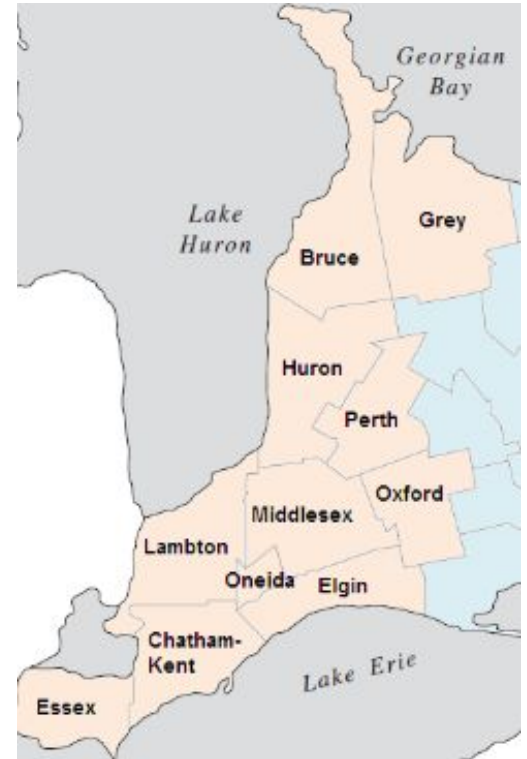

Paramedic Services not included:

Huron County Paramedic Services

Oneida Nation Paramedic Services

Oxford County Paramedic Services

Supplementary Table 1 – Final Primary Problem Code of Calls (N=9185)

|                                                     |              |
|-----------------------------------------------------|--------------|
|                                                     |              |
| Diabetic Emergency                                  | 67.5% (6196) |
| Other Medical/Trauma                                | 5.1% (469)   |
| Invalid Code                                        | 5.0% (461)   |
| Weakness/Dizziness/Unwell                           | 4.1% (374)   |
| Interfacility Transfer                              | 3.5% (324)   |
| Altered Level of Consciousness                      | 2.6% (235)   |
| Missing Code                                        | 1.9% (175)   |
| Active Seizure                                      | 1.3% (119)   |
| Confusion/Disorientation                            | 0.9% (80)    |
| Drug/Alcohol Overdose                               | 0.8% (78)    |
| Unconscious                                         | 0.7% (62)    |
| Dyspnea                                             | 0.7% (61)    |
| Musculoskeletal                                     | 0.7% (60)    |
| Stroke/Transient Ischemic Attack                    | 0.6% (56)    |
| Vital Signs Absent - Cardiac/Medical                | 0.6% (53)    |
| Hypotension                                         | 0.6% (51)    |
| Ischemic                                            | 0.5% (49)    |
| Behaviour/Psychiatric                               | 0.5% (44)    |
| Nausea/Vomiting/Diarrhea                            | 0.4% (40)    |
| Gynecologic Emergency                               | 0.4% (36)    |
| Non-Traumatic Abdominal/Pelvic/Perineal/Rectal Pain | 0.4% (34)    |

|                                  |           |
|----------------------------------|-----------|
| Headache                         | 0.2% (22) |
| Temporary Loss of Consciousness  | 0.2% (19) |
| Treatment/Diagnosis & Return     | 0.2% (14) |
| Poisoning/Toxic Exposure         | 0.1% (12) |
| Palpitations                     | 0.1% (10) |
| Back Pain                        | 0.1% (9)  |
| Environmental Emergency          | 0.1% (9)  |
| Allergic Reaction                | <0.1% (5) |
| Suspected Sepsis                 | <0.1% (5) |
| Hemorrhage                       | <0.1% (5) |
| Pulmonary Edema                  | <0.1% (4) |
| Obstetric Emergency              | <0.1% (4) |
| Vital Signs Absent - Traumatic   | <0.1% (2) |
| Convalescent/Invalid/Return Home | <0.1% (2) |
| Post-Arrest                      | <0.1% (1) |
| Cardiogenic Shock                | <0.1% (1) |
| Anaphylaxis                      | <0.1% (1) |
| Infectious Disease               | <0.1% (1) |
| Organ Recipient                  | <0.1% (1) |
| Newborn/Neonatal                 | <0.1% (1) |

Data are presented as % (N).
